# Supplementary material for: Estimation of CH 4 emission based on advanced 4D-LETKF assimilation system
Source: Copernicus journal article supplement (doi:10.5194/egusphere-2022-719), 2022-08-15
Supplement: Supplementary file 1 [file egusphere-2022-719-supplement.pdf]

## Supporting Information for

### Estimation of CH<sub>4</sub> emission based on advanced 4D-LETKF assimilation system

Jagat S. H. Bisht<sup>1\*</sup>, Prabir K. Patra<sup>1,2</sup>, Masayuki Takigawa<sup>1</sup>, Takashi Sekiya<sup>1</sup>, Yugo Kanaya<sup>1</sup>, and Naoko Saitoh<sup>2</sup>, and, and Kazuyuki Miyazaki<sup>3</sup>

<sup>1</sup>Research Institute for Global Change, JAMSTEC, Yokohama, 235-0019, Japan

<sup>2</sup>Center for Environmental Remote Sensing, Chiba University, Chiba, 263-8522, Japan

<sup>3</sup>Jet Propulsion Laboratory/California Institute for Technology, Pasadena, CA, USA,

\*corresponding author's e-mail: [jagatbisht@jamstec.go.jp](mailto:jagatbisht@jamstec.go.jp)

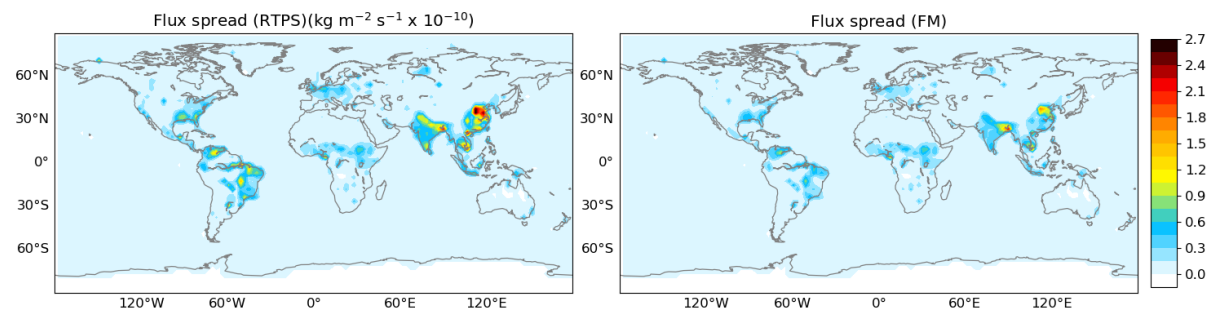

**Figure S1.** Initial analysis ensemble flux spread with RTPS and fixed multiplicative (FM) covariance inflation methods.

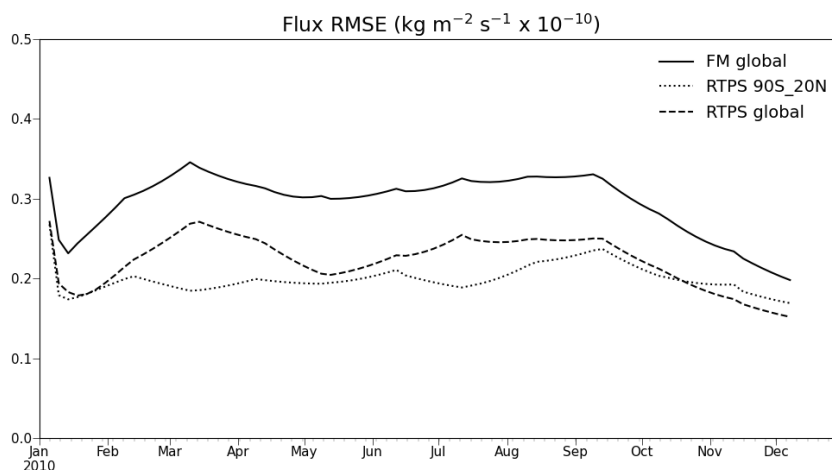

**Figure S2.** Time series of RMSE of surface CH<sub>4</sub> flux analysis, for 1 year of data assimilation at every grid using fixed multiplicative inflation and RTPS inflation methods over global landmass region.

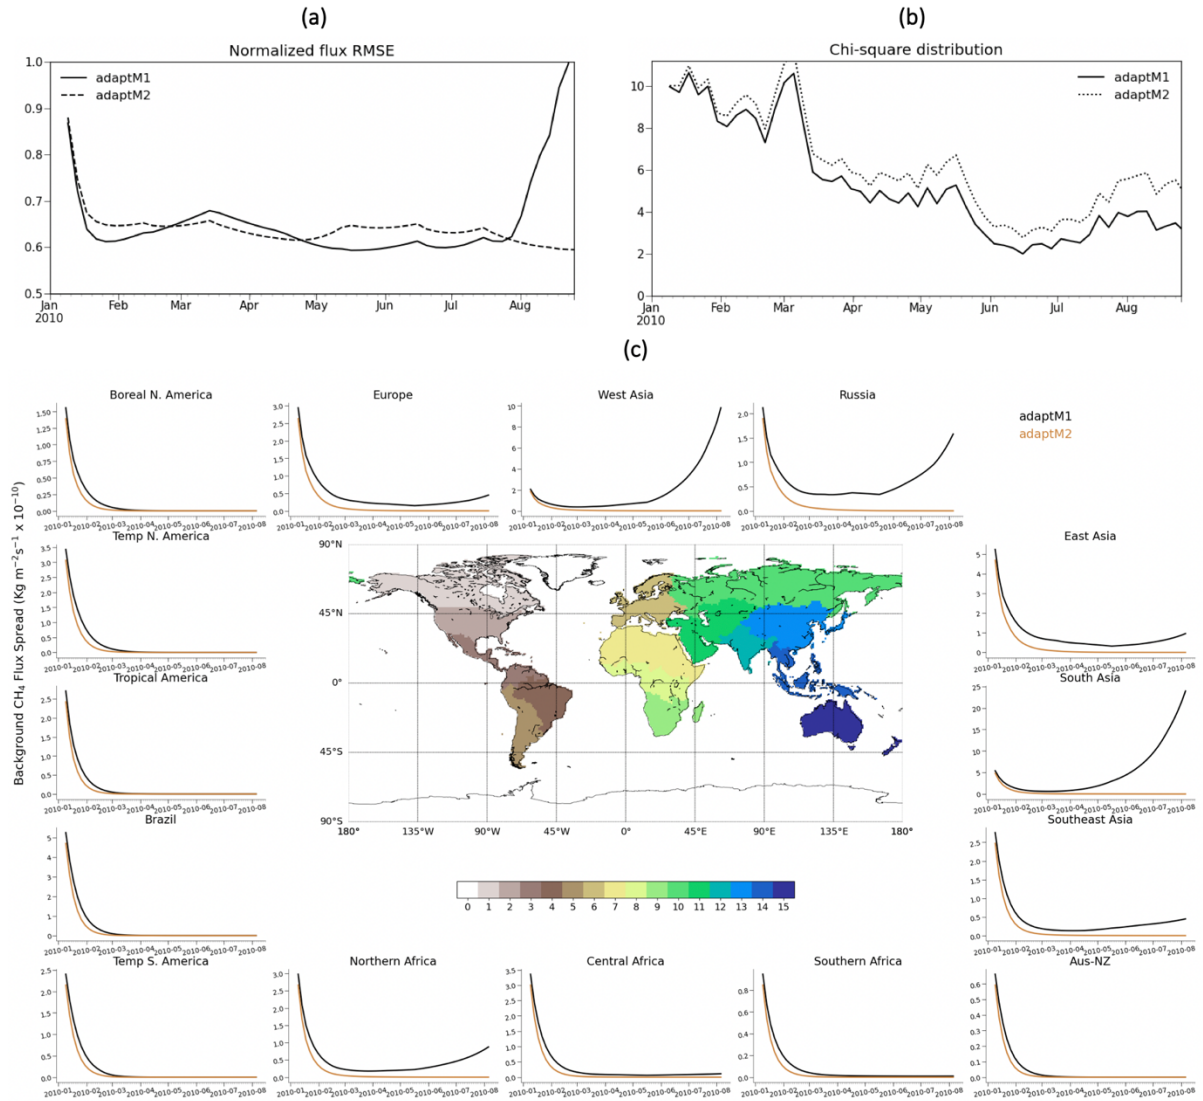

**Figure S3** CH<sub>4</sub> LETKF flux estimation time series for; (a) normalized RMSE estimated using adaptive multiplicative inflation method in two sensitivity experiments (adaptM1; 50% initial inflation, adaptM2; 40% initial inflation), (b) chi-square distribution comparison for adaptive multiplicative sensitivity experiments (c) background error spread evolution for adaptive multiplicative inflation experiments.

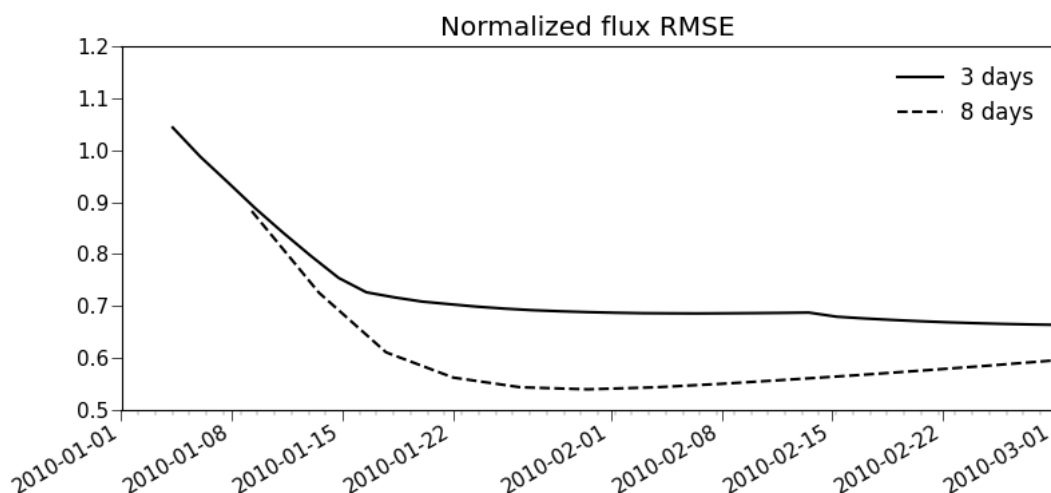

**Figure S4.** Time series of normalized RMSE estimated using 3 days and 8 days assimilation window for CH<sub>4</sub> LETKF data assimilation (inflation method: RTPS).

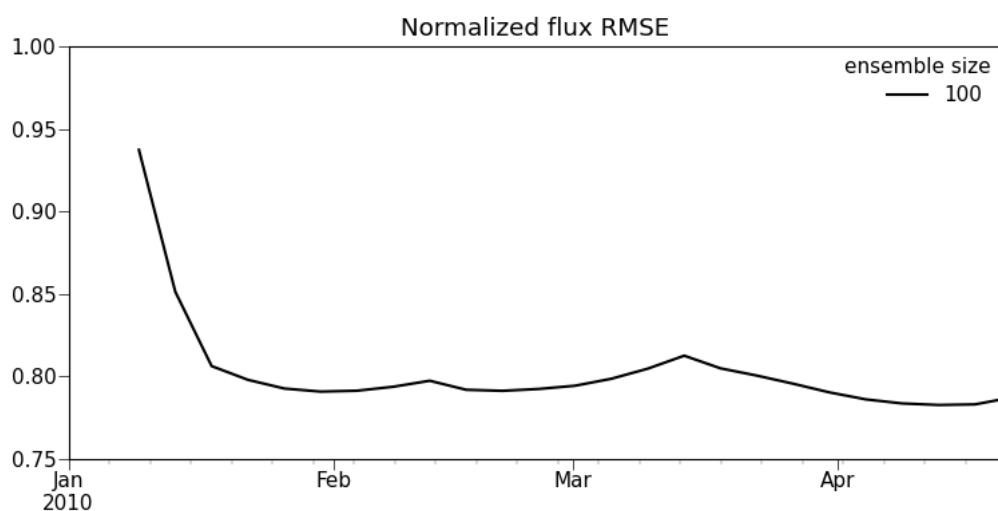

**Figure S5.** Time series of normalized RMSE of surface CH<sub>4</sub> flux analysis after assimilating GOSAT synthetic CH<sub>4</sub> observations shown for the period of 4 months using initial spread that is generated by considering the initial perturbation at each model grid by considering horizontal spatial error correlation between grid points among ensemble members, with a global mean correlation of 20%.

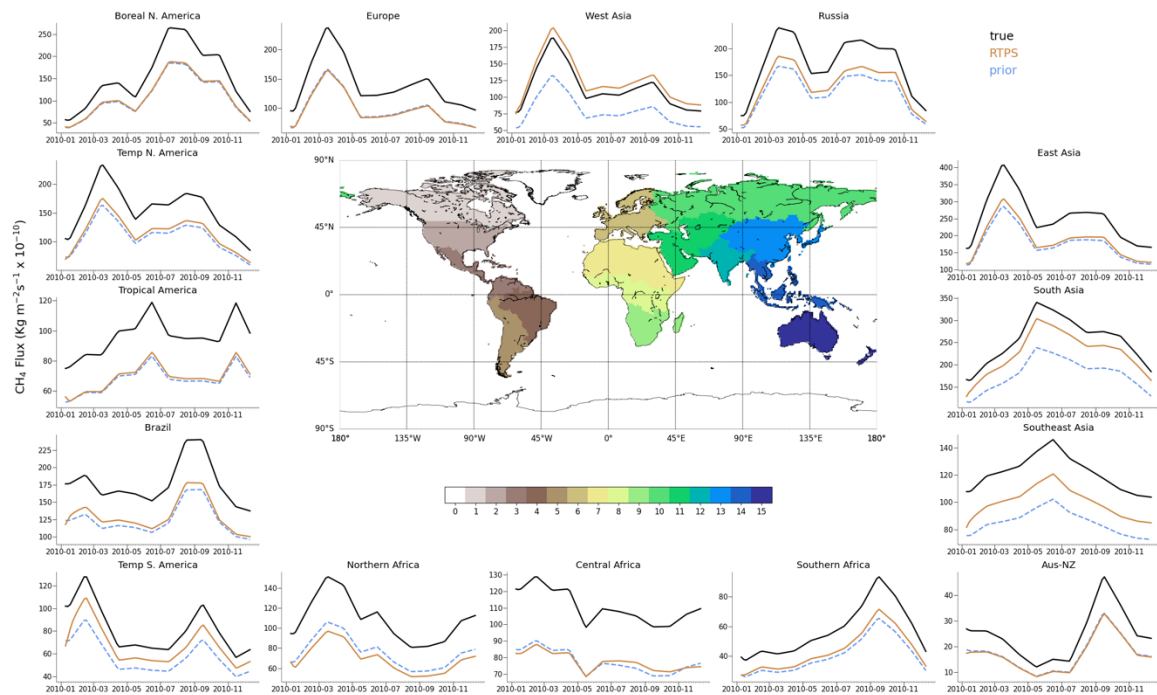

**Figure S6.** The 1-year CH<sub>4</sub> total flux seasonal cycles of true (black), prior (gray), and estimated from the LETKF (blue) in 15 regions using FM inflation method after assimilating synthetic GOSAT CH<sub>4</sub> observations (Fig. 6).

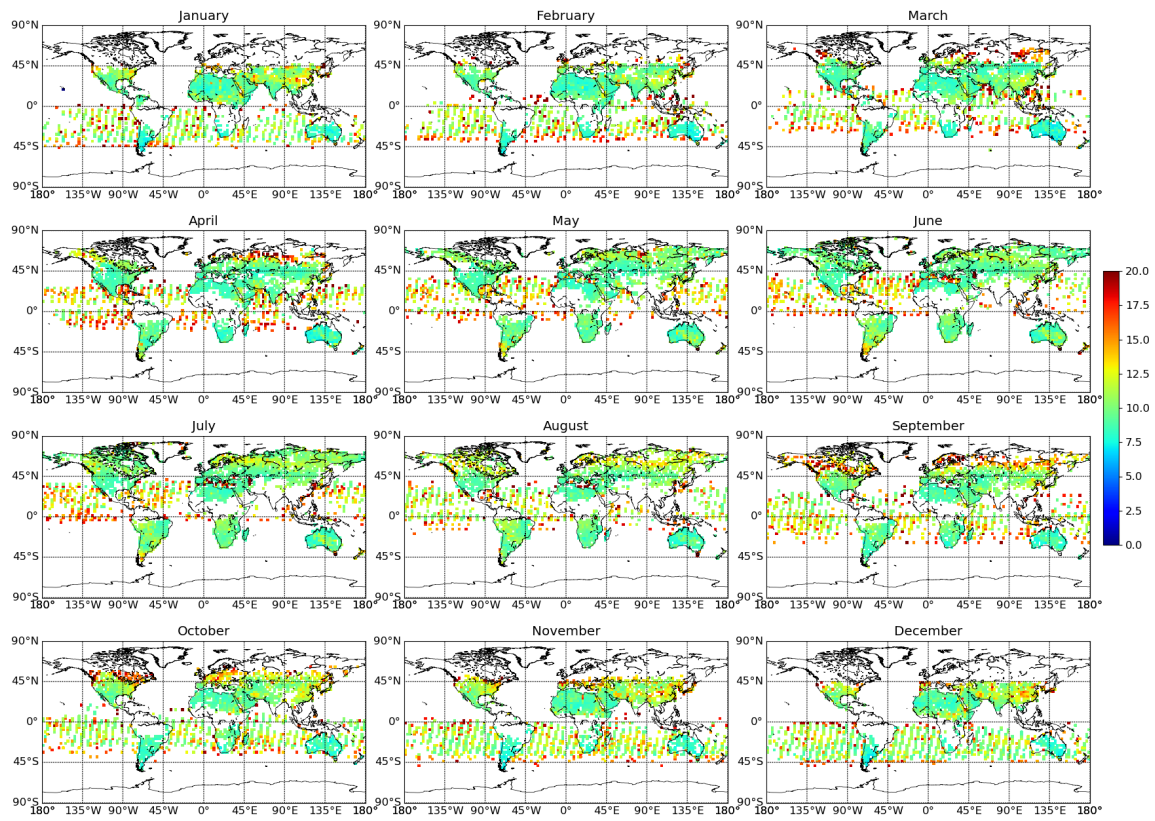

**Figure S7.** Monthly mean of real GOSAT observations retrieval error during the year 2010.
